# Supplementary material for: An Experimental Study on Antioxidant Enzyme Gene Expression in Trematomus newnesi (Boulenger, 1902) Experimentally Exposed to Perfluoro-Octanoic Acid
Source: MDPI journal article supplement (doi:10.3390/antiox12020352), 2023-02-02
Supplement: s1 [file s1]

Table S1: Primer pairs used for qRT-PCR. Amplicon sizes and annealing temperatures (Ta) are also indicated.

| isoform      | PRIMER                 | Sequences 5' → 3'        | Amplicon (bp) | T <sub>a</sub> (°C) |
|--------------|------------------------|--------------------------|---------------|---------------------|
| <i>sod1</i>  | SOD1_T.eulepidotus_FW  | GCAAAGCTCAACATCACGGA     | 125           | 60                  |
|              | SOD1_T.eulepidotus_RV  | CCAGCATTGCCCGTCTTTAG     |               | 60                  |
| <i>sod2</i>  | SOD2_T.bernacchii_FW   | GTGGAAGCCTTCGTATCGCT     | 108           | 60                  |
|              | SOD2_T.bernacchii_RV   | GAAGGTAGTAGGCGTGCTCC     |               | 60                  |
|              | 7_SOD2_T.newnesi_FW    | GCCTCAGCCAAACTTTAAACCTGG | 135           | 60                  |
|              | 7_SOD2_T.newnesi_RV    | CATGGTGCTTGCTGTGGTGC     |               | 60                  |
| <i>gpx1</i>  | GPx1b_T.eulepidotus_FW | CCCTCCTCCCTCATGACTGA     | 145           | 60                  |
|              | GPx1b_T.eulepidotus_RV | TGTCGCTGGTGAGGAACATC     |               | 60                  |
| <i>gpx4</i>  | GPx4b_T.bernacchii_FW  | TTTACGCATCCTCGCCTTCC     | 143           | 60                  |
|              | GPx4b_T.bernacchii_RV  | GATGAGCAGTGTCCCCGTTC     |               | 60                  |
| <i>gapdh</i> | GAPDH_T.bernacchii_FW  | AAGTATGACTCCACCCACGG     | 113           | 60                  |
|              | GAPDH_T.bernacchii_RV  | ATGTTAGCGGGGTCCTTCTC     |               | 60                  |
